# Supplementary material for: Evaluation of the in vitro and in vivo inhibitory effect of thymoquinone on piroplasm parasites
Source: PubMed Central journal article supplement (PMC6335684; doi:10.1186/s13071-019-3296-z), 2019-01-16

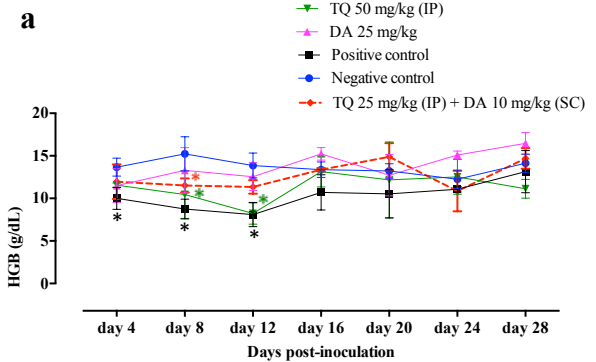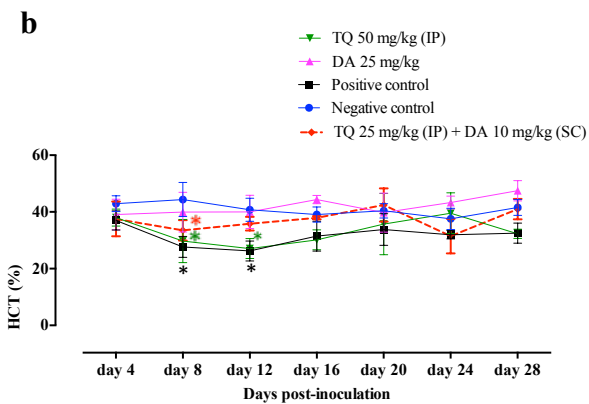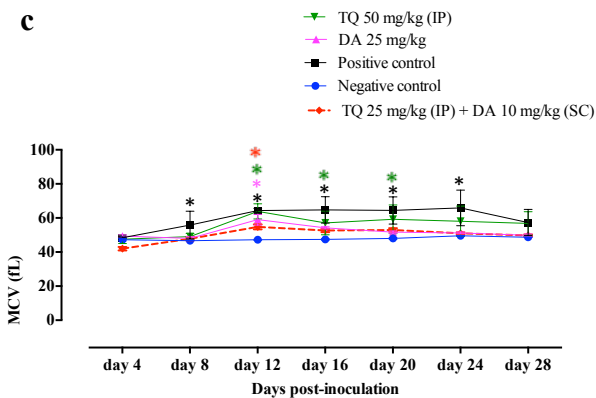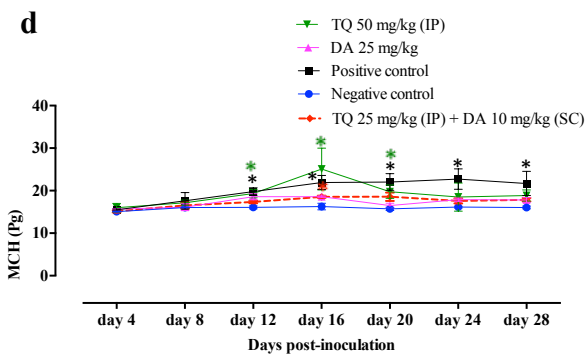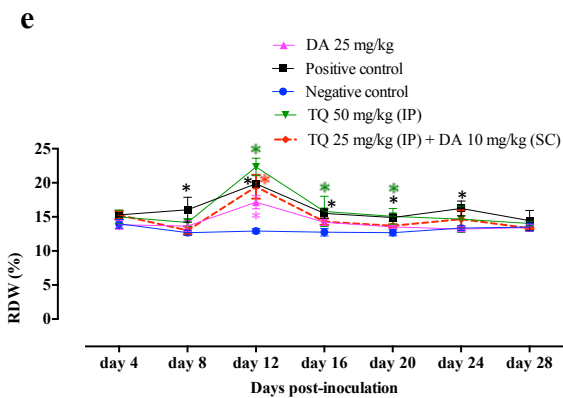

Supplement: 13071_2019_3296_MOESM3_ESM.pdf [file 13071_2019_3296_MOESM3_ESM.pdf]
